## **Comparative Analysis of Adverse Event Reporting on Reddit and the FDA Adverse Event Reporting System (FAERS)**

Catherine C. Shoults, PhD<sup>1</sup>, Dana Abulez, MSE<sup>1</sup>, Matthew Nowak, MS<sup>2</sup>, Alasiah Bledsoe<sup>3</sup>, Nathan Dormer, PhD<sup>4</sup>, Maryam Y. Garza, PhD<sup>1</sup>, Jonathan Bona, PhD<sup>1</sup>, Thomas Powell, MD<sup>1</sup>, Corey J. Hayes PharmD PhD MPH<sup>1,5,6</sup>

<sup>1</sup> Department of Biomedical Informatics, College of Medicine, University of Arkansas for Medical Sciences, Little Rock, Arkansas, USA.

<sup>2</sup> College of Medicine, University of Arkansas for Medical Sciences, Little Rock, Arkansas, USA.

<sup>3</sup> Information Systems and Operations Management Concentration, Goizueta Business School, Emory University, Atlanta, Georgia, USA.

<sup>4</sup> Adare Pharma Solution, Lenexa, Kansas, USA.

<sup>5</sup> Institute for Digital Health and Innovation, College of Medicine, University of Arkansas for Medical Sciences, Little Rock, Arkansas, USA.

<sup>6</sup> Central Arkansas Veterans Healthcare System, Eugene J. Towbin Healthcare Center, North Little Rock, Arkansas, USA.

Address correspondence to: Corey Hayes, PharmD, PhD, MPH, Department of Biomedical Informatics, College of Medicine, University of Arkansas for Medical Sciences, 4301 West Markham Slot 518, Little Rock, AR 72205-7101, USA [cjhayes@uams.edu](mailto:cjhayes@uams.edu)

### **Abstract**

This study explores the potential of Reddit as a pharmacovigilance data source by comparing its adverse event reports related to mental health drugs with those from the FDA Adverse Event Reporting System (FAERS). Using data mining techniques, we annotated 1,000 Reddit posts to identify drug-adverse event pairs, which were then compared to FAERS data. Significant differences were noted in the frequency and types of adverse events reported on each platform. For instance, Reddit showed higher reports of sexual dysfunction and cognitive disorders for certain drugs, which were less frequently reported in FAERS. This disparity suggests that Reddit could capture a different demographic or more candid discussions, potentially influenced by its pseudonymous nature. The findings indicate that social media platforms like Reddit can provide valuable insights into real-world drug effects, complementing traditional pharmacovigilance systems. This study highlights the need for further research to integrate social media data to enhance drug safety monitoring.

### **Introduction**

Pharmacovigilance, the study of a drug's safety and adverse event profile, is a crucial aspect of drug development and patient safety. The Food and Drug Administration (FDA) provides formal

reporting systems, such as the FDA Adverse Event Reporting System (FAERS) for drug manufacturers, clinicians, and consumers to report adverse events (1). The consumer reporting system suffers from bias in underreporting (2), who reports (3), how complete the reports are (4), notoriety bias (a type of selection bias in which adverse events more well known are more likely to be reported) (5), and what adverse events are considered worthy of reporting (6). Social media data represent an exciting pharmacovigilance data source because of the ability to uncover adverse events sooner (7), receive reports from a novel population (8), and understand real-world use of drugs (9). While many studies have examined the methodology for extracting pharmacovigilance posts using machine learning and natural language processing (NLP) (10–16), few studies have provided characterization and quantification of what adverse events are found in social media. Of the research that characterizes the medical effects social media users ascribe to their prescription drugs use, the most popular source of data has been the website, Twitter<sup>1</sup> (17,18). However, the free bulk data available from Twitter’s Academic application programming interface (API) has been suspended (19) and novel sources of social media pharmacovigilance data are needed. Reddit is an ideal source of pharmacovigilance data, especially around drugs that deal with mental health, because of its pseudonymous environment and large character base allowing free-flowing dialogue (20,21). Boettcher’s review of the literature on social media use in healthcare research found 54 studies using the Reddit platform discussed mental health. Of those, 94 percent were about depression, and 43 percent researched anxiety (21). Despite its rich text environment and discussion of mental health, Reddit is underused as a pharmacovigilance data source perhaps because of its diverse topic areas, long character base, and lack of peer reviewed literature (22).

The objective of this study was two-fold: (1) to evaluate the feasibility of mining Reddit data on mental health drug use and adverse events and (2) to compare Reddit-derived data to FAERS-derived data to evaluate whether Reddit-derived data capture the essential elements needed for FAERS reporting. This paper expands the literature by recording the adverse events found in Reddit and quantifying how this social media pharmacovigilance source compares to the adverse events voluntarily reported by consumers directly to the FDA via FAERS.

## Methods

### *Reddit Data*

The Reddit API created by Jason Baumgartner, Pushshift.io, was used to create a Reddit corpus (23). The top 15 psychoactive drugs prescribed in the United States (24) were used as search terms due to their higher rates of adverse events and more common use by younger populations. Search terms including both the branded name and the active pharmaceutical ingredient (see Table 1 for each drug’s rank, brand name, active ingredient, and indication). This ranking was provided by IQVIA (formerly IMS Health and Quintiles), a leading global

---

<sup>1</sup> The Twitter platform was renamed X in 2023 but this study uses Twitter’s original name to avoid confusion.

provider of advanced analytics and contract research services to the healthcare and clinical trial industry. IQVIA prescription data covers 93 percent of outpatient prescriptions.<sup>2</sup> In addition to the top 15 drug names and ingredients, misspellings were included as Pushshift.io search terms. Misspellings were derived using word2vec.

| IQVIA Rank | Brand Name | Active Ingredient                 | Indication                   |
|------------|------------|-----------------------------------|------------------------------|
| 1          | Zoloft     | sertraline                        | depression                   |
| 2          | Xanax      | alprazolam                        | anxiety                      |
| 3          | Lexapro    | escitalopram                      | depression                   |
| 4          | Desyrel    | trazodone                         | anxiety, depression          |
| 5          | Wellbutrin | bupropion                         | depression                   |
| 6          | Adderall   | dextroamphetamine,<br>amphetamine | ADHD                         |
| 7          | Prozac     | fluoxetine                        | depression                   |
| 8          | Celexa     | citalopram                        | depression                   |
| 9          | Cymbalta   | duloxetine                        | depression                   |
| 10         | Ativan     | lorazepam                         | anxiety                      |
| 11         | Effexor    | venlafaxine                       | depression                   |
| 12         | Seroquel   | quetiapine                        | bipolar disorder, depression |
| 13         | Lamictal   | lamotrigine                       | bipolar disorder             |
| 14         | Concerta   | methylphenidate                   | ADHD                         |
| 15         | Kapvay     | clonidine                         | ADHD                         |

**Table 1:** List of top 15 psychoactive drugs as identified by IQVIA. Rank is based on number of prescriptions in the United States. Indication is from the FDA label (package insert) of the drug.

One hundred thousand (100,000) random Reddit posts were pulled from the full Reddit corpus. This sample of posts were fed into Prodi.gy Bulk, which takes the textual posts and generates their embeddings using the sentence transformer model paraphrase-MiniLM-L6-v2. Paraphrase-MiniLM-L6-v2 is a pre-trained language model developed by Hugging Face (25).

The embeddings were transformed from multi-dimensional embeddings to two-dimensional space using Uniform Manifold Approximation and Project (UMAP). This 2D representation allows for an interactive visualization to be created, where each dot represents a Reddit post, and hovering over the dot allows the user to see the post's text. The dots were color coded based on if they contained the phrase "adverse event" or "side effect", and clusters with these terms were manually reviewed to determine if the cluster of posts contained discussion of pharmacovigilance posts.

Clusters of interest were downloaded from the Prodi.gy Bulk interface and annotated as discussing pharmacovigilance. Posts were labeled to conform to the definition of a safety report outlined in the *Guideline on Clinical Safety Data Management: Data Elements for the Transmission of Individual Case Safety Reports*: a safety report is defined to require an

<sup>2</sup> <https://www.iqvia.com/insights/the-iqvia-institute/available-iqvia-data>

identifiable patient, an identifiable reporter, a suspect drug, and an adverse event (26,27). In order to ensure that all safety reports met this definition, only posts where the poster was writing about their own personal experience were included. This approach has been used previously to best conform to the International Council for Harmonization (11) guidelines.

Three annotators independently extracted 1000 drug-adverse event pairs. Posts were studied to find relationships between the Redditor's drug use and listed adverse event. Annotators were instructed to look for causal language (e.g., "because", "caused", "led to", "made me") linking a drug to an adverse event. Table 2 shows example text linking an adverse event to a listed drug. "Drug" was defined as any drug name, including branded name, generic name, and misspellings (drug classes were not included). "Adverse event" was defined as any attributed event described as due to the drug. If an adverse event could be attributed to more than one drug, each drug-adverse event pair was listed individually (polypharmacy is outside the scope of this research). Indication or disease states were recorded when the author stated they were taking the drug for a stated indication, listed their current disease state, or when the author posted to a disease-specific subreddit.

| ID | Reddit Post                                                                                                    | Drug     | Adverse Event   |
|----|----------------------------------------------------------------------------------------------------------------|----------|-----------------|
| 1  | I was on Zoloft but quit because I couldn't sleep.                                                             | Zoloft   | couldn't sleep  |
| 2  | I've been on Wellbutrin and Lamictal. I really loved Lamictal but it stopped working and I got a rash.         | Lamictal | stopped working |
| 2  | I've been on Wellbutrin and Lamictal. I really loved Lamictal but it stopped working and I got a rash.         | Lamictal | Rash            |
| 3  | Yeah, Lexapro definitely gave me brain zaps. I've heard other people get tremors but that didn't happen to me. | Lexapro  | Brain zaps      |

**Table 2:** Synthetic Reddit posts showing how annotations were recorded. Note that Reddit Post with ID 2 is duplicated because two adverse events were discussed in the post.

If multiple drugs were mentioned in combination with an adverse event without causal language to just one drug, the drug-to-adverse event pair was listed for each drug. If the same adverse event was listed multiple times in a post, it was only recorded once. If the drug was listed as ineffective, this was documented as an adverse event. Adjudication was performed between the annotators to reconcile differences.

### FAERS Data

FAERS was accessed via the FDA's public dashboard (28). The top five most common drugs from the Reddit corpus were used to query the FAERS dashboard. The query was limited to consumer reporters. After obtaining all adverse event reports from FAERS, the count of the five most reported adverse events and the total number of case reports per drug were recorded for comparison to the Reddit results.

## Normalization

Drugs were normalized to their branded name. A dictionary of brand name, generic, and common misspellings was used to standardize the drugs to their branded name. Adverse events were normalized to the FAERS Side Effect Resource (SIDER) Preferred Term. A medical doctor reviewed these mappings for clinical plausibility (see Appendix 1 to view mapping of adverse event to FAERS term and clinical notes).

## Statistical Analysis

Python 3.8.5 was used to analyze these data. Pandas was used to calculate relative frequencies and examine adverse event descriptive statistics (29). The Reddit data and FAERS data were merged using an inner join on the drug and FAERS-normalized adverse event terms. The SciPy Stats package was used to compare the FAERS adverse events to the Reddit adverse events using Chi-Square tests (30). The null hypothesis was that there was no statistical significance between FAERS adverse events and Reddit adverse events. This hypothesis was tested using a p-value set to 0.05. Visualizations were created with Matplotlib (31) and Seaborn (32).

## Results

The Reddit data included 1000 drug-adverse event pairs spanning from 2010 to 2022 (see Table 3 for the distribution by year). The most common drug in the Reddit posts was Zoloft followed by Lexapro, Effexor, and Lamictal (see Figure 1). Zoloft had 231 drug mentions, Lexapro had 229 drug mentions, Effexor had 178 drug mentions, Lamictal had 148, and Wellbutrin had 114 drug mentions.

| Post Year | Post Count |
|-----------|------------|
| 2022      | 225        |
| 2021      | 271        |
| 2020      | 191        |
| 2019      | 120        |
| 2018      | 37         |
| 2017      | 49         |
| 2016      | 45         |
| 2015      | 32         |
| 2014      | 6          |
| 2013      | 5          |
| 2012      | 3          |
| 2011      | 10         |
| 2010      | 6          |

**Table 3:** Number of Reddit posts by the year that the post was made on the platform.

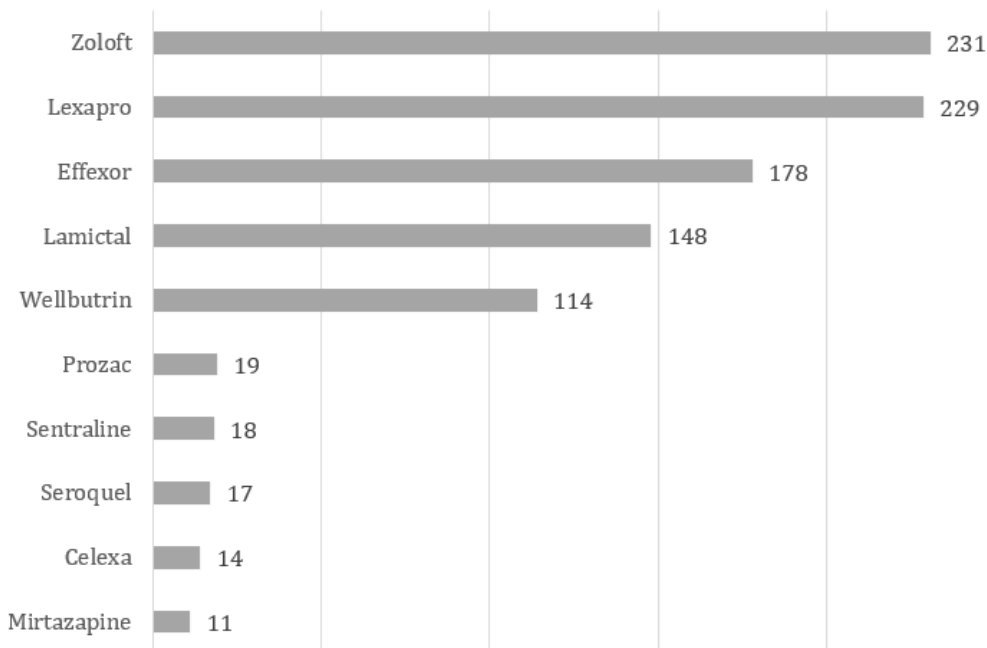

**Figure 1:** Most common drug names found in the Reddit posts along with the number of mentions of the drug name. Drug names represent mentions of drugs in their branded form, generic name, and misspellings. Note: “Sentraline” may be a misspelling of “Sertraline” meaning these could be under the heading of “Zoloft”. The two were kept separate in this analysis.

Reddit subreddits by drug type are noted in Figure 2. The subreddits reflect the disease states that the Redditors discussed in their posts. The top subreddits were often named for the drug’s branded or generic name or common diseases associated with the drug. The top subreddit for Effexor was r/effexor. Lamictal’s top subreddit was r/bipolar, and Lexapro’s top subreddit was r/lexapro. Wellbutrin was most commonly found in r/bupropion and Zoloft’s in r/zoloft. The disease states associated with each drug were often depression, anxiety, and bipolar disease. Depression was the most common disease mentioned for Effexor and Wellbutrin drug-adverse event pairs. Anxiety was the top disease mentioned for Lexapro and Zoloft. Bipolar disease was the top disease listed for Lamictal.

| Drug            | Subreddit (r/)  |            | Disease State |            |
|-----------------|-----------------|------------|---------------|------------|
|                 | Subreddit (r/)  | Post Count | Disease State | Post Count |
| <b>Effexor</b>  | effexor         | 39         | depression    | 33         |
|                 | antidepressants | 13         | anxiety       | 27         |
|                 | depression      | 13         | bipolar       | 13         |
|                 | bipolar         | 9          | OCD           | 7          |
|                 | effexorsuccess  | 7          | ADHD          | 6          |
| <b>Lamictal</b> | bipolar         | 60         | bipolar       | 75         |
|                 | lamictal        | 26         | anxiety       | 18         |
|                 | bipolar2        | 11         | depression    | 13         |
|                 | bipolarreddit   | 11         | bipolar2      | 8          |

|                   |                 |     |            |    |
|-------------------|-----------------|-----|------------|----|
|                   | epilepsy        | 7   | epilepsy   | 8  |
| <b>Lexapro</b>    | lexapro         | 112 | anxiety    | 55 |
|                   | askdocs         | 17  | depression | 36 |
|                   | askdoctors      | 11  | stress     | 16 |
|                   | lamictal        | 9   | GAD        | 12 |
|                   | antidepressants | 5   | bipolar    | 6  |
| <b>Wellbutrin</b> | bupropion       | 21  | depression | 51 |
|                   | depression      | 19  | anxiety    | 22 |
|                   | bipolar         | 9   | bipolar    | 13 |
|                   | askpsychiatry   | 6   | ADHD       | 6  |
|                   | adhd            | 3   | BPD        | 3  |
| <b>Zoloft</b>     | zoloft          | 97  | anxiety    | 90 |
|                   | depression      | 23  | depression | 58 |
|                   | anxiety         | 19  | OCD        | 13 |
|                   | antidepressants | 9   | bipolar    | 8  |
|                   | bipolar         | 6   | PTSD       | 6  |

**Figure 2:** Count of subreddits and disease states associated with drugs that were mentioned in drug-adverse event pairs.

## FAERS Data Results

A total of 62,787 reports were obtained from the FAERS dashboard, spanning from 2010 through 2023. The top five most common adverse events for each drug are listed in Table 4. The most common drug found in FAERS was Zoloft, with 23,732 adverse event reports. This was followed by Lamictal, with 16,043 reports, and Wellbutrin, with 11,406. Effexor had 7,576 reports, and Lexapro had 4,030 reports. Zoloft's most commonly reported adverse events were the Drug was Ineffective, Insomnia, and Anxiety. Lamictal's most common adverse event was Rash, Seizure, and Drug Ineffective. Wellbutrin had Drug Ineffective as its most common adverse event, followed by Insomnia and Anxiety. Effexor's top adverse event was Drug Withdrawal Syndrome, Dizziness, and Drug Ineffective. Finally, Lexapro's most common adverse events were Drug Ineffective, Anxiety, and Depression.

| <b>Effexor<br/>(7,576)</b>     | <b>Lamictal<br/>(16,043)</b> | <b>Lexapro<br/>(4,030)</b> | <b>Wellbutrin<br/>(11,406)</b> | <b>Zoloft<br/>(23,732)</b> |
|--------------------------------|------------------------------|----------------------------|--------------------------------|----------------------------|
| Drug Withdrawal Syndrome (902) | Rash (2,575)                 | Drug Ineffective (474)     | Drug Ineffective (1,272)       | Drug Ineffective (1,919)   |
| Nausea (683)                   | Seizure (1,571)              | Anxiety (395)              | Seizure (828)                  | Insomnia (1,567)           |
| Dizziness (667)                | Drug Ineffective (1,322)     | Depression (383)           | Insomnia (800)                 | Anxiety (1,553)            |
| Drug Ineffective (555)         | Headache (825)               | Suicidal Ideation (345)    | Headache (648)                 | Dizziness (1,402)          |
| Headache (548)                 | Pruritus (798)               | Nausea (314)               | Depression (621)               | Nausea (1,376)             |



**Table 4:** Five most common drugs in the Reddit gold standard posts and their corresponding FAERS drug counts and top five adverse events.

## Reddit Data Results

The most common drugs mentioned in the 1000 Reddit posts were Zoloft, Lexapro, Effexor, Lamictal, and Wellbutrin, as can be seen in Table 5. The most commonly mentioned of Zoloft's 231 adverse events were Fatigue, Apathy, and Sexual Dysfunction. Of Lexapro's 229 adverse events, Sexual Dysfunction, Apathy, and Cognitive Disorder were the most common. Of Effexor's 178 adverse events, Sexual Dysfunction, Fatigue, and Paraneesthesia were the most common. Of Lamictal's 148 adverse events, Cognitive Disorder, Anxiety, and Fatigue were the most common. Finally, of Wellbutrin's 114 adverse events, Anxiety, Fatigue, and Mania were the most common.

| <b>Effexor<br/>(n=178)</b> | <b>Lamictal<br/>(n=148)</b> | <b>Lexapro<br/>(n=229)</b> | <b>Wellbutrin (n=114)</b> | <b>Zoloft<br/>(n=231)</b>  |
|----------------------------|-----------------------------|----------------------------|---------------------------|----------------------------|
| Sexual Dysfunction<br>(20) | Cognitive Disorder<br>(11)  | Sexual Dysfunction<br>(21) | Anxiety (8)               | Fatigue (22)               |
| Fatigue (10)               | Anxiety (9)                 | Apathy (18)                | Fatigue (6)               | Apathy (18)                |
| Paraneesthesia (6)         | Fatigue (8)                 | Cognitive Disorder<br>(11) | Mania (6)                 | Sexual Dysfunction<br>(15) |
| Weight Increased (6)       | Apathy (5)                  | Anxiety (10)               | Cognitive Disorder<br>(5) | Anxiety (9)                |
| Anxiety (4)                | Irritability (5)            | Fatigue (8)                | Irritability (5)          | Insomnia (9)               |

**Table 5:** Five most common drugs in the Reddit gold standard posts and their corresponding drug counts and top five adverse events.

## Drug and Adverse Event Comparison

The top five drugs in this study, Effexor, Lamictal, Lexapro, Wellbutrin, and Zoloft, were compared across Reddit and FAERS via Chi-Square analysis (Table 6). Reddit's Effexor reporting rates of Fatigue, Paraneesthesia, and Weight Increased were found to be similar between Reddit and FAERS (p-values of 0.054, 0.625, and 0.876, respectively). However, Sexual Dysfunction showed a significantly higher reporting rate on Reddit compared to FAERS, with a p-value of less than 0.001.

Moving to Lamictal, several adverse events, including Anxiety, Apathy, Cognitive Disorder, and Irritability, exhibited significant differences between the two datasets, with Reddit reporting higher frequencies for each (p-values of 0.023, <0.001, <0.001, and 0.034, respectively). On the other hand, instances of Fatigue showed no significant difference in reporting rates between the two platforms (p-value=0.336). For Lexapro, Reddit had a higher frequency of reported



adverse events for Apathy, Cognitive Disorder, Depression, and Sexual Dysfunction when compared to FAERS (p-values<0.001 for all). However, the rate of Anxiety reporting was significantly lower on Reddit than FAERS (p-value=0.006). Other adverse events, such as Abnormal Dreams, Insomnia, Irritability, and Mania, showed no significant difference between the two platforms (p-values of 0.120, 0.045, 0.877, and 0.661, respectively). In the Wellbutrin Reddit dataset, significant differences were observed in the Reddit dataset compared to FAERS for the reporting rates of Cognitive Disorder, Irritability, and Mania (p-values<0.001, 0.020, and <0.001, respectively). Reporting rates for Anxiety and Fatigue showed no significant differences between the two platforms (p-values of 0.440 and 0.204, respectively).

Lastly, for Zoloft, Redditors reported higher rates of Apathy, Fatigue, and Sexual Dysfunction (p-values<0.001 for all). Additionally, the Reddit sample indicated significant differences in the frequencies of Depression, Dizziness, and Nausea (p-values of 0.040, 0.016, and 0.038, respectively). However, reporting rates for Anxiety, Insomnia, Mania, and Tremor were not significantly different between Reddit and FAERS (p-values of 0.105, 0.099, 0.100, and 0.191, respectively). Of note, Drug Withdrawal Syndrome was among the top five most common adverse events in the FAERS reports for Effexor, Lexapro, and Zoloft, which was not observed in the Reddit reporting rates. For visualization of Reddit and FAERS adverse event rates, please see Appendix 2. These findings highlight the differences in adverse event reporting between Reddit and FAERS and provide valuable insights into drug safety assessment across these platforms. The study results were significant in shedding light on potential variations in drug-related adverse event reporting on different platforms.

| Drug Type and FAERS Adverse Event Category | Reddit Frequency Count and Percent | Reddit Sample Size | FAERS Frequency Count and Percent | FAERS Sample Size | Chi-Square | P-value |
|--------------------------------------------|------------------------------------|--------------------|-----------------------------------|-------------------|------------|---------|
| <b>Effexor</b>                             |                                    |                    |                                   |                   |            |         |
| Fatigue                                    | 10 (5.6%)                          | 178                | 233 (3.1%)                        | 7576              | 3.7        | 0.054   |
| Paranesthesia                              | 6 (3.4%)                           | 178                | 311 (4.1%)                        | 7576              | 0.24       | 0.625   |
| Sexual Dysfunction                         | 20 (11.2%)                         | 178                | 54 (0.7%)                         | 7576              | 203.74     | <0.001  |
| Weight Increased                           | 6 (3.4%)                           | 178                | 272 (3.6%)                        | 7576              | 0.02       | 0.876   |
| <b>Lamictal</b>                            |                                    |                    |                                   |                   |            |         |
| Anxiety                                    | 9 (6.1%)                           | 148                | 467 (2.9%)                        | 16043             | 5.16       | 0.023   |
| Apathy                                     | 5 (3.4%)                           | 148                | 34 (0.2%)                         | 16043             | 61.19      | <0.001  |
| Cognitive Disorder                         | 11 (7.4%)                          | 148                | 98 (0.6%)                         | 16043             | 102.05     | <0.001  |
| Fatigue                                    | 8 (5.4%)                           | 148                | 621 (3.9%)                        | 16043             | 0.92       | 0.336   |
| Irritability                               | 5 (3.4%)                           | 148                | 216 (1.4%)                        | 16043             | 4.5        | 0.034   |
| <b>Lexapro</b>                             |                                    |                    |                                   |                   |            |         |
| Abnormal Dreams                            | 5 (2.2%)                           | 229                | 43 (1.1%)                         | 4030              | 2.42       | 0.120   |
| Anxiety                                    | 10 (4.4%)                          | 229                | 395 (9.8%)                        | 4030              | 7.44       | 0.006   |
| Apathy                                     | 18 (7.9%)                          | 229                | 35 (0.9%)                         | 4030              | 86.19      | <0.001  |
| Cognitive Disorder                         | 11 (4.8%)                          | 229                | 23 (0.6%)                         | 4030              | 49.02      | <0.001  |
| Depression                                 | 6 (2.6%)                           | 229                | 383 (9.5%)                        | 4030              | 12.37      | <0.001  |
| Fatigue                                    | 8 (3.5%)                           | 229                | 292 (7.2%)                        | 4030              | 4.66       | 0.031   |
| Insomnia                                   | 7 (3.1%)                           | 229                | 255 (6.3%)                        | 4030              | 4.02       | 0.045   |
| Irritability                               | 6 (2.6%)                           | 229                | 99 (2.5%)                         | 4030              | 0.02       | 0.877   |
| Mania                                      | 5 (2.2%)                           | 229                | 72 (1.8%)                         | 4030              | 0.19       | 0.661   |
| Sexual Dysfunction                         | 21 (9.2%)                          | 229                | 51 (1.3%)                         | 4030              | 81.47      | <0.001  |
| <b>Wellbutrin</b>                          |                                    |                    |                                   |                   |            |         |
| Anxiety                                    | 8 (7.0%)                           | 114                | 613 (5.4%)                        | 11406             | 0.6        | 0.440   |
| Cognitive Disorder                         | 5 (4.4%)                           | 114                | 30 (0.3%)                         | 11406             | 63.34      | <0.001  |
| Fatigue                                    | 6 (5.3%)                           | 114                | 361 (3.2%)                        | 11406             | 1.61       | 0.204   |
| Irritability                               | 5 (4.4%)                           | 114                | 183 (1.6%)                        | 11406             | 5.44       | 0.020   |
| Mania                                      | 6 (5.3%)                           | 114                | 99 (0.9%)                         | 11406             | 24.14      | <0.001  |
| <b>Zoloft</b>                              |                                    |                    |                                   |                   |            |         |
| Anxiety                                    | 9 (3.9%)                           | 231                | 1,553 (6.5%)                      | 23732             | 2.63       | 0.105   |
| Apathy                                     | 18 (7.8%)                          | 231                | 388 (1.6%)                        | 23732             | 52.07      | <0.001  |
| Depression                                 | 6 (2.6%)                           | 231                | 1,367 (5.8%)                      | 23732             | 4.24       | 0.040   |
| Dizziness                                  | 5 (2.2%)                           | 231                | 1,402 (5.9%)                      | 23732             | 5.8        | 0.016   |
| Fatigue                                    | 22 (9.5%)                          | 231                | 769 (3.2%)                        | 23732             | 28.3       | <0.001  |
| Insomnia                                   | 9 (3.9%)                           | 231                | 1,567 (6.6%)                      | 23732             | 2.73       | 0.099   |
| Mania                                      | 5 (2.2%)                           | 231                | 249 (1.1%)                        | 23732             | 2.71       | 0.100   |
| Nausea                                     | 6 (2.6%)                           | 231                | 1,376 (5.8%)                      | 23732             | 4.31       | 0.038   |
| Sexual Dysfunction                         | 15 (6.5%)                          | 231                | 169 (0.7%)                        | 23732             | 100.36     | <0.001  |
| Tremor                                     | 5 (2.2%)                           | 231                | 906 (3.8%)                        | 23732             | 1.71       | 0.191   |

**Table 6:** Drug and Adverse Event pairs for top Reddit drugs compared to FAERS using chi-square analysis; FAERS: FDA Adverse Event Reporting System

## Discussion

Social media provides a view into real-world use of drugs and their associated adverse effects. With the suspension of Twitter's API, alternative sources should be explored. This study assessed differences between the reporting of adverse events between Reddit and FAERS for the top five most common drugs from the gold standard. Overall, similar types of adverse events for each of the five drugs were found in both reporting platforms (i.e., Reddit and FAERS). However, significant differences were found in some drug-adverse event pairs, as well as differences in the rates of similar adverse events. When examining the top five adverse events for each drug discussed in Reddit, new types of issues top the list. Effexor included the addition of Fatigue, Paraneesthesia, Weight Increase, and Anxiety. In addition, Sexual Dysfunction was reported at a much higher rate as compared to FAERS. Reddit's Lamictal reporting rates showed the addition of Cognitive Disorder, Anxiety, Fatigue, Apathy, and Irritability. Lexapro also included Apathy, Cognitive Disorder, Anxiety, and Fatigue but added in Sexual Dysfunction as the most commonly reported adverse event. Wellbutrin reporting in Reddit had Anxiety, Fatigue, Mania, Cognitive Disorder, and Irritability as the top five most reported adverse events as compared to FAERS. Zolofit exhibits significant dissimilarities between Reddit and FAERS with Fatigue, Apathy, Sexual Dysfunction, Anxiety, and Insomnia topping the adverse event list in Reddit. None of these mentioned adverse events were found in the FAERS top five, underscoring the disparity between the two sources. These results indicate social media platforms like Reddit might provide additional insights into patient experiences with drugs. Rates of adverse event reporting were generally higher among Reddit posts, as compared to FAERS, for most events for the top 5 common drugs. In addition, Reddit contained adverse events not reported to FAERS. This indicates Reddit, and potentially other social media platforms, may be helpful sources to compliment FAERS reporting.

Nguyen's 2017 study examined Twitter, Reddit, and LiveJournal to understand which social media website's adverse event rates best reflected the adverse events found in the Side Effect Resource (33). Posts from each platform were filtered to only contain 10 psychotropic drugs of interest, and a lexicon was used to look up adverse events (33). The study found that Reddit was most similar in adverse event rates to SIDER as compared to the other social media platforms (33). A limitation of this work was that a simple mention of an adverse event was used as a proxy for the social media user experiencing and writing about an adverse event caused by a drug. Assuming that mentioning an adverse event in a post directly implies the individual experienced it is a limitation, as such references may merely be speculative or descriptive without confirming an actual occurrence.

Another study, conducted in 2020 by Natter and Michel, examined memantine experiences on Reddit and identified side effects from 136 users (34). This is the only pharmacovigilance research documenting specific adverse events described by Redditors available to date.

Twitter-based research reporting drug and adverse event associations are more common. Zhou and Hultgren's 2020 study compared Twitter adverse events to the FDA's adverse events (18). The study used tweets labeled for drug-adverse event pairs for comparison to FAERS and

provided detailed analysis of what adverse events were due to hydrocodone/acetaminophen, prednisone, amoxicillin, gabapentin, and metformin (18). Li, et al. also studied and reported on detailed Twitter adverse events as compared to FAERS; however, this study used mentions of a potential adverse event as a proxy for identifying the drug-adverse event pair as causally related (according to the text of the social media post) (35). As noted by the authors, the limitations of this assumption make it difficult to make conclusions from the study (35). O'Connor et al. studied tweets for pharmacovigilance and used 1008 hand-annotated tweets to understand the adverse event profiles of 10 drugs of interest. (36). While the study did not compare to the FDA's consumer reported adverse events, it did list adverse effects and their associated frequency in the tweets (36). Smith et al. used Machine Learning to extract 2617 potential adalimumab adverse events from Twitter and manually annotated to find 801 true adverse events, which were manually mapped to UMLS concept IDs (17). True adverse events were compared to adverse events documented in FAERS and the researchers found moderate agreement between Twitter and the FDA (17).

This study builds on these methods by applying a similar approach to compare Reddit to FAERS. With the suspension of Twitter's Academic API, the use of social media pharmacovigilance with Reddit data has become even more vital. The evaluation of psychotropic drugs provides novel insights into how Redditors describe the effects of their mental health drugs. This study expands the current literature both by providing Reddit data and by focusing on the drugs that younger, male users may use--a demographic that is less represented in FAERS--Redditors skew young and male (37). The results show differences in reporting to the FDA, especially in the area of Sexual Dysfunction. This could be due to the relative anonymity of Reddit as compared to direct reporting or talking to a clinician. Reddit has been shown to be a place for discussion about mental health (20) and provides a community to discuss shared experiences (38). As noted by Correia et al. in their review of mining social media, clinicians consistently under report depression and pain and rarely use screening tools for adverse events, providing a strong opportunity for social media to afford insights into the patient experience (39). It is also possible that the younger, male user base cares more about the adverse events discussed in Reddit as compared to the older, female user base of the traditional reporting methods. To gain further clarity on this matter, future research could focus on comprehending the demographics of Redditors who post about pharmacovigilance events. Such investigations would offer valuable insights into the differing perspectives and priorities surrounding adverse event discussions across Reddit and FAERS user cohorts.

## Limitations

This study's findings need to be interpreted in light of several important limitations. The use of causal language to link drug to adverse event is subjective and could introduce bias or inconsistencies in the annotation process. The percent agreement for the normalized terms was 46 percent; however, this was exact match and many of the discrepancies were due to

differences in including adjectives or replicating the same adverse event. The subjective nature of human written speech continues to be an issue when mining social media. In addition, hand normalization to the FDA preferred terms could introduce errors or variation into the recorded adverse event to drug relationships. These mappings were reviewed by a clinician to help mitigate this limitation and the mappings can be found in Appendix 1.

Polypharmacy was considered out-of-scope for this research. Many posts contained Redditors who ingested many types of drugs over time or at the same time. This means that an important part of the clinical profile of the Redditors was lost. Future research should integrate polypharmacy into the scope and learn how the real-world use of multiple medications affects adverse event rates.

Chi-square test does not establish causality and should be interpreted as associations and differences, not direct cause-effect relationships. In addition, the Redditor associating an adverse event with their medications does not infer causality. The Redditors are assumed to have a lack of clinical confirmation regarding the accuracy, severity, and causality of the adverse events.

These data were collected using unsupervised Machine Learning. The technique used 100,000 randomly selected posts from a large Reddit corpus, but the 1,000-post subset that was collected may not represent all mental health pharmacovigilance posts in Reddit. The use of a clustering algorithm on word embeddings may have focused the study on similar posts, thereby skewing to that use of language. This limits the generalizability of these findings.

Finally, social media provides a unique platform to peek into the lives of online users; however, the potential for misinformation is always lurking. Anonymity is a “two-edged sword”, with the potential for more vulnerable, open communication offset by mistruths and exaggeration. Despite these limitations, this study contributes to the validation of Reddit as a pharmacovigilance data source and the potential for adding the voices of Redditors to the understanding of drug safety profiles.

## **Conclusion**

This study demonstrates the feasibility of using Reddit as a pharmacovigilance tool to supplement data collected from FAERS and is particularly rich in capturing adverse event data on population groups are underrepresented in FAERS (e.g., young males). Therefore, Reddit could be used in the future to better estimate adverse event profiles for medications in real-time, which may be particularly important for newly approved medications.

The Reddit pharmacovigilance data analysis identified significant differences from the consumer reported events. The five psychotropic drugs included in the analysis—Effexor, Lamictal Lexapro, Wellbutrin, and Zoloft—encompassed adverse events in areas such as

Sexual Dysfunction and Cognitive Disorder that were reported more commonly than what was found in FAERS. Lamictal showed significantly less reporting of Rash in Reddit, which may be indicative of a clinician's bias to report known relationships between a drug and adverse event. Similarities between the platforms point to consistent issues with use of these drugs (or at least, consistent reporting of issues). Wellbutrin's profile of Anxiety and Fatigue showcase the similarities between the pharmacovigilance reporting platforms.

Future research in this field should focus on replicating the research with a larger and more diverse dataset. While caution should be used applying rules-based or Machine Learning approaches to infer association between mention of a drug and mention of an adverse event, large scale annotation of relationships will provide additional insights into the distribution and frequency of adverse events in psychotropic medication use as mentioned on Reddit. Our hope is that this study demonstrates the value of Reddit as a complementary data source for pharmacovigilance. Further developing the tools and data from Reddit social media pharmacovigilance can enhance our understanding of drug safety and improve patient care.

## Acknowledgments

This work was generously supported by the National Science Foundation, Award No. OIA-1946391 Data Analytics that are Robust and Trusted (DART): From Smart Curation to Socially Aware Decision Making.

## References

1. U.S. Food and Drug Administration. Questions and Answers on FDA's Adverse Event Reporting System (FAERS). US Dep Heal Hum Serv [Internet]. 2016;4–7. Available from: <https://www.fda.gov/drugs/surveillance/questions-and-answers-fdas-adverse-event-reporting-system-faers>
2. Alatawi YM, Hansen RA. Empirical estimation of under-reporting in the U.S. Food and Drug Administration Adverse Event Reporting System (FAERS). Expert Opin Drug Saf [Internet]. 2017;16(7):761–7. Available from: <https://doi.org/10.1080/14740338.2017.1323867>
3. Sonawane KB, Cheng N, Hansen RA. Serious Adverse Drug Events Reported to the FDA: Analysis of the FDA Adverse Event Reporting System 2006-2014 Database [Internet]. Vol. 24, Journal of Managed Care & Specialty Pharmacy JMCP July. 2018 [cited 2021 Apr 16]. Available from: [www.jmcp.org](http://www.jmcp.org)
4. Getz KA, Stergiopoulos S, Kaitin KI. Evaluating the completeness and accuracy of MedWatch data. Am J Ther. 2014;21(6):442–6.
5. Alomar M, Tawfiq AM, Hassan N, Palaian S. Post marketing surveillance of suspected adverse drug reactions through spontaneous reporting: current status, challenges and the future. Ther Adv Drug Saf. 2020;11:1–11.
6. Hasford J, Goettler M, Munter KH, Müller-Oerlinghausen B. Physicians' knowledge and



- attitudes regarding the spontaneous reporting system for adverse drug reactions. *J Clin Epidemiol*. 2002;55(9):945–50.
7. Yang CC, Jiang L, Yang H, Tang X. Detecting Signals of Adverse Drug Reactions from Health Consumer Contributed Content in Social Media. *Hi-Kkd '12*. 2012;(May 2016).
  8. Dirkson A. Knowledge discovery from patient forums: gaining novel medical insights from patient experiences. *SIKS Diss Ser* [Internet]. 2022; Available from: <https://scholarlypublications.universiteitleiden.nl/handle/1887/3492655>
  9. Lavertu A, Vora B, Giacomini KM, Altman R, Rensi S. A New Era in Pharmacovigilance: Toward Real-World Data and Digital Monitoring. *Clin Pharmacol Ther* [Internet]. 2021;0(0):1–6. Available from: [www.cpt-journal.com](http://www.cpt-journal.com)
  10. T.k. B, Annavarapu CSR, Bablani A. Machine learning algorithms for social media analysis: A survey. *Comput Sci Rev* [Internet]. 2021;40:100395. Available from: <https://doi.org/10.1016/j.cosrev.2021.100395>
  11. Comfort S, Perera S, Hudson Z, Dorrell D, Meireis S, Nagarajan M, et al. Sorting Through the Safety Data Haystack: Using Machine Learning to Identify Individual Case Safety Reports in Social-Digital Media. *Drug Saf* [Internet]. 2018;41(6):579–90. Available from: <https://doi.org/10.1007/s40264-018-0641-7>
  12. Magge A, Klein AZ, Miranda-Escalada A, Al-Garadi MA, Alimova I, Miftahutdinov Z, et al. Overview of the Sixth Social Media Mining for Health Applications (#SMM4H) Shared Tasks at NAACL 2021. In: *Social Media Mining for Health, SMM4H 2021 - Proceedings of the 6th Workshop and Shared Tasks*. 2021.
  13. Ben Abacha A, Chowdhury MFM, Karanasiou A, Mrabet Y, Lavelli A, Zweigenbaum P. Text mining for pharmacovigilance: Using machine learning for drug name recognition and drug-drug interaction extraction and classification. *J Biomed Inform* [Internet]. 2015;58:122–32. Available from: <http://dx.doi.org/10.1016/j.jbi.2015.09.015>
  14. Hasan A, Levene M, Weston D. Learning structured medical information from social media. *J Biomed Inform* [Internet]. 2020;110:103568. Available from: <https://doi.org/10.1016/j.jbi.2020.103568>
  15. Alvaro N, Conway M, Doan S, Lofi C, Overington J, Collier N. Crowdsourcing Twitter annotations to identify first-hand experiences of prescription drug use. *J Biomed Inform*. 2015;58:280–7.
  16. Bian J. Towards large-scale twitter mining for drug-related adverse events. *SHB*. 2021;(1):25–32.
  17. Smith K, Golder S, Sarker A, Loke Y, O'Connor K, Gonzalez-Hernandez G. Methods to Compare Adverse Events in Twitter to FAERS, Drug Information Databases, and Systematic Reviews: Proof of Concept with Adalimumab. *Drug Saf* [Internet]. 2018;41(12):1397–410. Available from: <https://doi.org/10.1007/s40264-018-0707-6>
  18. Zhou Z, Hultgren KE. Complementing the US Food and Drug Administration adverse event reporting system with adverse drug reaction reporting from social media: Comparative analysis. *JMIR Public Heal Surveill*. 2020;6(3):1–12.
  19. Calma J. Twitter just closed the book on academic research. *The Verge* [Internet]. 2023;1. Available from: <https://www.theverge.com/2023/5/31/23739084/twitter-elon-musk->



- api-policy-chilling-academic-research
20. Choudhury M De, De S. Mental health discourse on reddit: Self-disclosure, social support, and anonymity. *Proc 8th Int Conf Weblogs Soc Media, ICWSM 2014*. 2014;71–80.
  21. Boettcher N. Studies of depression and anxiety using reddit as a data source: Scoping review. *JMIR Ment Heal*. 2021;8(11):1–30.
  22. Proferes N, Jones N, Gilbert S, Fiesler C, Zimmer M. Studying Reddit: A Systematic Overview of Disciplines, Approaches, Methods, and Ethics. *Soc Media Soc*. 2021;7(2).
  23. Baumgartner J, Zannettou S, Keegan B, Squire M, Blackburn J, Io P. The Pushshift Reddit Dataset [Internet]. Vol. 2020, Proceedings of the International AAAI Conference on Web and Social Media. 2020 May [cited 2021 Apr 16]. Available from: [www.aaai.org](http://www.aaai.org)
  24. Perez A. Top 25 Psychiatric Medications of 2018 [Internet]. *PsychCentral*. 2018 [cited 2020 Jan 8]. p. 1. Available from: <https://psychcentral.com/blog/top-25-psychiatric-medications-for-2018#Most-Prescribed-Psychiatric-Drugs-for-2018>
  25. Devlin B, Liu R. Sentence-BERT: Sentence Embeddings using Siamese BERT-Networks. 2014;
  26. EMA EMA. Module VI – Collection, management and submission of reports of suspected adverse reactions to medicinal products (Rev 2). *Guidel good Pharmacovigil Pract* [Internet]. 2017;Revision 2(July):144. Available from: [http://www.ema.europa.eu/docs/en\\_GB/document\\_library/Regulatory\\_and\\_procedural\\_guideline/2017/08/WC500232767.pdf](http://www.ema.europa.eu/docs/en_GB/document_library/Regulatory_and_procedural_guideline/2017/08/WC500232767.pdf)
  27. ICH. Guidance for Industry E2B(R3) Electronic Transmission of Individual Case Safety Reports (ICSRs) Implementation Guide-Data Elements and Message Specification. Final [Internet]. 2022;(April). Available from: <https://www.fda.gov/vaccines-blood-biologics/guidance-compliance-regulatory-information-biologics/biologics-guidances>
  28. Kumar A. The Newly Available FAERS Public Dashboard: Implications for Health Care Professionals. Vol. 54, *Hospital Pharmacy*. 2019.
  29. McKinney W, Team PD. *Pandas - Powerful Python Data Analysis Toolkit*. Pandas - Powerful Python Data Anal Toolkit. 2015;
  30. Virtanen P, Gommers R, Oliphant TE, Haberland M, Reddy T, Cournapeau D, et al. SciPy 1.0: fundamental algorithms for scientific computing in Python. *Nat Methods*. 2020;17(3).
  31. Hunter J, Dale D, Firing E, Droettboom M. *Matplotlib: Visualization with Python*. Abgerufen 05.10.2020. 2020.
  32. Waskom M. seaborn: statistical data visualization. *J Open Source Softw*. 2021;6(60).
  33. Nguyen T, Larsen ME, O’Dea B, Phung D, Venkatesh S, Christensen H. Estimation of the prevalence of adverse drug reactions from social media. *Int J Med Inform* [Internet]. 2017;102:130–7. Available from: <http://dx.doi.org/10.1016/j.ijmedinf.2017.03.013>
  34. Natter J, Michel B. Memantine misuse and social networks: A content analysis of Internet self-reports. *Pharmacoepidemiol Drug Saf*. 2020;29(9):1189–93.
  35. Li Y, Jimeno Yepes A, Xiao C. Combining Social Media and FDA Adverse Event Reporting System to Detect Adverse Drug Reactions. *Drug Saf* [Internet]. 2020;43(9):893–903. Available from: <https://doi.org/10.1007/s40264-020-00943-2>

36. O'Connor K, Pimpalkhute P, Nikfarjam A, Ginn R, Smith KL, Gonzalez G. Pharmacovigilance on twitter? Mining tweets for adverse drug reactions. AMIA Annu Symp Proc. 2014;2014:924–33.
37. Scattelberg W. The Demographics of Reddit: Who Uses the Site? [Internet]. Alphr. 2021 [cited 2021 Apr 16]. Available from: <https://www.alphr.com/demographics-reddit/>
38. Shoults CC, Rutherford MW, Kemp AS, Addicott MA, Brown A, Greene CJ, et al. Analysis of Caregiver Burden Expressed in Social Media Discussions. Int J Environ Res Public Health. 2023;20(3).
39. Correia RB. Mining social media data for biomedical signals and health related behavior. Annu Rev Biomed Data Sci. 2020;3:433–58.

## Appendix 1

### Normalization to FAERS Terms

#### Abnormal Dreams

---

crazy dreams  
dreams are weird  
dreams that play out like movies  
nightmares  
stressful dreams  
vivid dreams  
weird dreams

#### Acne

---

acne

#### Alopecia

---

hair coming out in clumps  
hair loss  
lost at least 50% of the volume of my hair  
the part in the hairline has a burning sensation

#### Anorexia

---

decreased appetite  
don't feel hungry  
little to no appetite  
lost appetite  
low appetite  
no appetite  
nonexistent appetite  
not needing to eat  
unable to eat

#### Anxiety

---

anxiety  
anxiety  
anxiety attacks  
anxiety getting worse  
anxiety got worse  
anxiety is through the roof  
anxiety worse  
anxious  
crippling anxiety  
edgy  
extreme anxiety  
heightened anxiety

insane anxiety  
like full nervous breakdown  
made me super anxious  
more panicky  
nervousness  
ocd  
panic attack  
panic attacks  
racing thoughts  
racy thoughts  
ruminating  
waking up in a panic  
wired

### **Apathy**

---

anhedonia  
apathetic  
automated cyborg  
complacent  
detached  
emotional blunting  
emotional numbness  
emotionally disconnected  
emotionally flat  
emotionally numb  
emotionless  
emotions are dulled  
emotions were non existent  
emptiness  
feel disconnected from social situations  
feel like a zombie  
feel numb  
feeling of not being able to cry  
felt like a zombie  
flatness  
focus is not as good  
hard to feel much of anything  
hard to think critically  
inability to cry  
lack of motivation  
lack of pleasure  
loss of feeling  
lost motivation  
low motivation

made me boring/bored  
made me dull  
no motivation  
numb  
numb and dark emptiness  
numbed feelings  
out of it  
rarely cry  
shrinks my emotional range  
turned into a zombie  
unable to feel sadness  
unmotivated  
wanted to be alone

### **Cognitive Disorder**

---

affecting thinking  
brain fog  
can't remember things  
cognitive decline  
communication became difficult  
effect my memory  
extra foggy  
feel like I had no thought process  
feel like nothing is real  
feel very out of it  
foggy  
foggy in the brain  
fuzziness  
impaired memory  
inattentive  
memory gaps  
memory is a wash  
memory issues  
memory loss  
out of my head in public  
severe brain fog  
spacey  
spaciness  
struggling to remember words  
vocabulary is so poor

### **Constipation**

---

abnormal pooping cycle  
constipation  
harder to go poop

mild constipation

### **Crying**

---

can't stop crying

contemplate crying all day

crying

crying uncontrollably

hard to control my tears

uncontrollable crying

### **Depersonalisation/Derealisation Disorder**

---

depersonalization

depersonalized

derealization

dissoicating

dp/dr

horrible derealization and existential ocd

### **Depression**

---

can't stop crying

depressed

depression

depression getting worse

depressive symptoms

depressive thoughts

feel hopeless

feel sad for no reason

feeling very down

focussed on morbid and depressing thoughts

hopelessness

made me feel more depressed

make my depression deeper

sad

sadness

severe depressive episode

### **Diarrhoea**

---

diarrhea

diarrhoea

light diarrhea

### **Dizziness**

---

constant dizziness

dizziness

dizzy

dizzy spells

### **Drug Ineffective**

---

ineffective

stopped working

### **Drug Withdrawal Syndrome**

---

feels like coming off heroine

withdrawal

withdrawals

### **Fatigue**

---

bad fatigue

did nothing but sleep

drowsiness

drowsy

exhausted

exhausted all the time

exhaustion

fatigue

have to nap

lethargic

lethargy

lost energy

lower endurance

making me sleepy

not even tired anymore

sedated

sleep 20h a day

sleep more

sleepy

slept a lot

sluggish

some drowsiness

spend the whole day in bed

stay in bed

struggle to leave the house

super tired

tired

tired after eating

tired/wired at the same time

tiring

trapped in my sleeping body

was not getting out of bed

weak

weakness

zero motivation

### **Headache**

---

extreme migranes



head ache  
headache  
headaches  
migraine  
mild headaches

### **Hyperhidrosis**

---

cold sweat  
night sweats  
sweat  
sweat easily  
sweating  
sweating like hell  
sweaty

### **Insomnia**

---

can't get back to sleep  
can't go to sleep  
can't sleep  
could not sleep  
fucks with my sleep  
haven't been able to sleep at night  
insomnia  
insomniac  
lack of sleep  
not getting any deep sleep  
not sleeping as soundly  
ruined my sleep  
sleep issues  
trouble sleeping  
trouble with sleep  
unable to sleep  
up all night  
wakefulness  
wasn't sleeping

### **Irritability**

---

aggression  
agitated  
anger  
extreme irritability  
extremely agitated  
frustrated  
general tenseness  
irritability  
irritable

irritated  
irritable  
more irritable  
nasty irritable  
outbursts  
soooooo easy to piss off

### **Mania**

---

euphoric  
give me mania  
hyper  
hypomania  
hypomaniac  
hypomaniac episode  
made me manic  
mania  
manic  
psychosis/manic episode  
rapid cycling  
spending all my money on junk  
spurts of mild mania  
too happy  
went manic

### **Menstruation Irregular**

---

late period  
mini period  
spotting

### **Mood Swings**

---

emotional swings  
mood swings  
mood swings worse  
mood variability  
moods are out of control  
weepy  
went kind of crazy

### **Nausea**

---

dry heaving  
nausea  
nauseated  
nauseous  
sour stomach  
stomach flu  
stomach is a mess

### **Nervous**

---

jitteriness

jitters

### Other

---

3 month long period

acid reflux

aggression

aggressive

allergic

allergic reaction

altered vision

anger

appetite problems

aura

bdd

binging uncontrollably

biting my gum

black out when I drink

blurry vision

body feels a lot lighter

brain feels fried

brain is swiss cheese

brain was moving slowly

broken several teeth

bruises that won't go away

can't communicate

can't even remember the difference between the days

change in left eye vision

chest pressure

chest squeezing

chew on my tongue

clenching my jaw

cloudy

cloudy mindedness

cold

confused

confusion

cramping

crave sugar

dark spots

dead

did not trip on lsd

discontinuation syndrome

disoriented

dreams feel extremely real  
dropping more body weight  
dry mouth  
everything is so slow  
everything seems slightly smaller / separated from me  
failing super light weight  
faint  
feel awful  
feel like I had no thought process  
feel like shit  
feel like shit first few days  
feel really sick  
feel the need to always be biting down  
feeling faint  
feeling horrible  
feeling overly apologetic  
feels like shit  
feet feel weird  
felt horrible  
felt like I was dying  
felt like there was cold water inside of my entire body  
flu like symptoms  
food cravings  
frequent urination  
fuck up my ability to trip  
fucked me up  
gastrointestinal disturbances  
gerd  
going so nuts  
got so sick i went to the er'  
gotten much worse  
groggy  
hallucinations  
hands feel weird  
have bad thoughts  
hay-feverish reactions  
head feels super heavy  
head rushes  
heart palpitations  
heart pounding  
heart race  
heartburn  
heat intolerance

hellish experience  
hot flashes  
huge pupils  
hungrier  
hungry all the time  
hypertension  
hypothermia  
impossible to stay hydrated  
inability to concentrate  
increased appetite  
intrusive thoughts  
issue  
jaw clenching  
lack of balance  
lifts started sucking  
light sensitivity  
little bumps  
losing my train of thought  
made dick smaller  
made me crazy  
made me feel dumb  
made me feel even worse  
made my thoughts race  
making me feel insane  
mental breakdowns every second  
messed me up  
mixed feeling  
more emotional  
motor function retardation  
negative thoughts  
nostalgia  
overheating  
overwhelming emotions  
previous hard time  
pupils were saucers  
racing mind  
running nose  
scattered  
screwed the whole cycle up  
self harming  
shakiness  
shitty meet  
sleep walking

slow  
slowness in my muscles  
sneezing  
sore throat  
sporadic and randomly changing thoughts  
stuffy nose  
swelling of joints  
terrible dandruff  
terrible experience  
the worst  
thinning along with dry patches on my scalp and behind my ears  
tremors in my hands  
unable to concentrate  
unknown  
urinating the stream is at reduced speed'  
visual grid upon waking  
wanted to break up with partner  
warmer a lot easier  
weird burning sensations  
weird thing with my right foot'  
worsened ulcerative colitis  
worst night / 3 days of my life  
yawning

#### **Pain**

---

bodily pains

#### **Paraesthesia**

---

brain shivers  
brain zaps  
electrical pop-rock feeling in the brain  
jolts  
sense of touch feels dulled  
shocks  
zaps

#### **Paranoia**

---

paranoia  
paranoid

#### **Pruritus**

---

itching  
itching eyes/face  
itchy  
made my legs really itchy

#### **Psychotic Behaviour**

---

psychosis

psychotic episode

### **Rash**

---

itchy red spots on belly

rash

skin irritation

### **Restless**

---

can't sit still

constantly move my foot

need to move all the time

restless

restlessness

### **Serotonin Syndrome**

---

serotonin toxicity

serotonin syndrome

### **Sexual Dysfunction**

---

arousal issues

can't orgasm in under 2 hours

can't orgasm with partner

complete lack of intimacy

couldn't have an orgasm

dead below the waist

hard for me to cum

hard to finish

hard to maintain arousal

hard to orgasm

having an orgasm very difficult

impotent

inability to orgasm

increase in the inability to orgasm

increased sex drive

insatiable sexual need

kill sex drive

lack of sex drive

lessen sex drive

libido effects

loss of libido

lost ability to feel sexual stimulation

lost my libido

low libido

low sex drive

lowered my sex drive

lowered sex drive

my member doesn't work as well as it used to



never cum  
no desire for sex  
no sex drive  
no sexual libido at all  
not having a sex drive  
orgasm effects  
orgasms seem muted  
premature ejaculation  
problems with ejaculation  
sex drive  
sex drive is blah  
sex drive through the roof  
sex drive went down  
sex when you're with someone and it takes forever  
sexual dysfunction  
sexual issues  
sexual side effects  
shitty orgasms  
taking a long time to orgasm  
trouble getting to climax  
trouble keeping my erection  
unable to orgasm  
zero libido

#### **side effect**

---

side effect  
side effects  
side effects

#### **Spasm**

---

bicep in spasm  
muscle spasms  
spasm in my ab muscle  
stutter movements

#### **Suicidal Ideation**

---

often think of suicide  
suicidal  
suicidal ideation  
suicidal thoughts  
suicidal

#### **Tardive Dyskinesia**

---

tardive dyskinesia

#### **Tremor**

---

hand tremor  
hand tremors

leg and arm twitches  
shaking  
shaky  
tremor  
tremors  
twitches  
twitching  
uncontrollable muscle

---

**Vertigo**

vertigo

---

**Vomiting**

barfing  
vomitting

---

**Weak**

weak  
weak and shaky feet  
weak and shaky hands

---

**Weight Increased**

gain weight  
gained a lot of weight  
gained 60lbs  
gained over 30 pounds  
gaining weight  
weight gain

---

**Weight loss**

lost weight

---

**Yawning**

yawning  
yawny

## Appendix 2: Visualization of Reddit and FAERS Adverse Event Rates

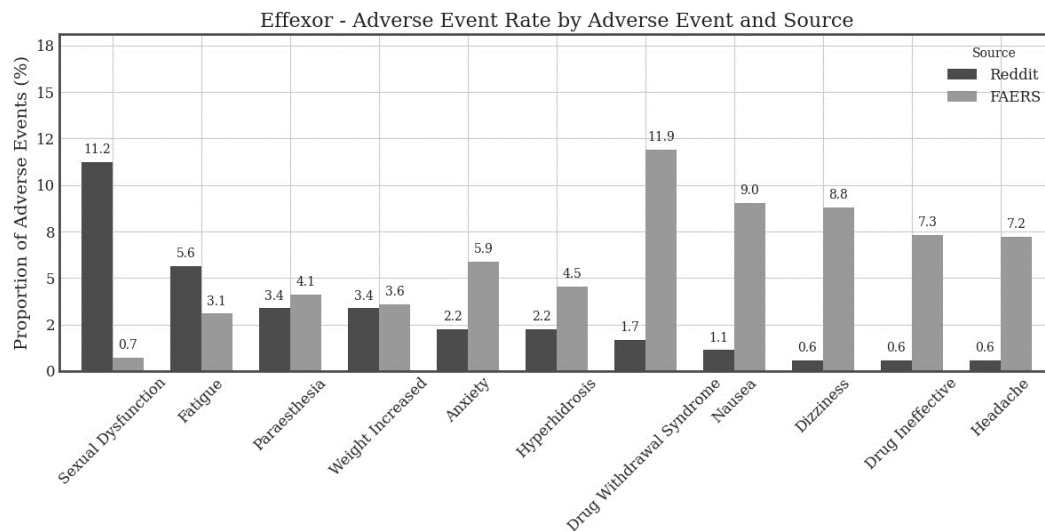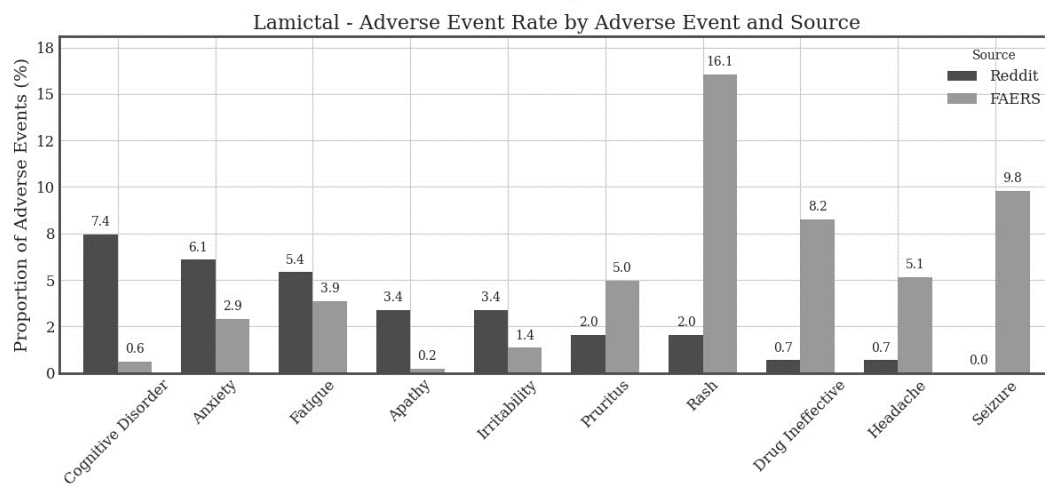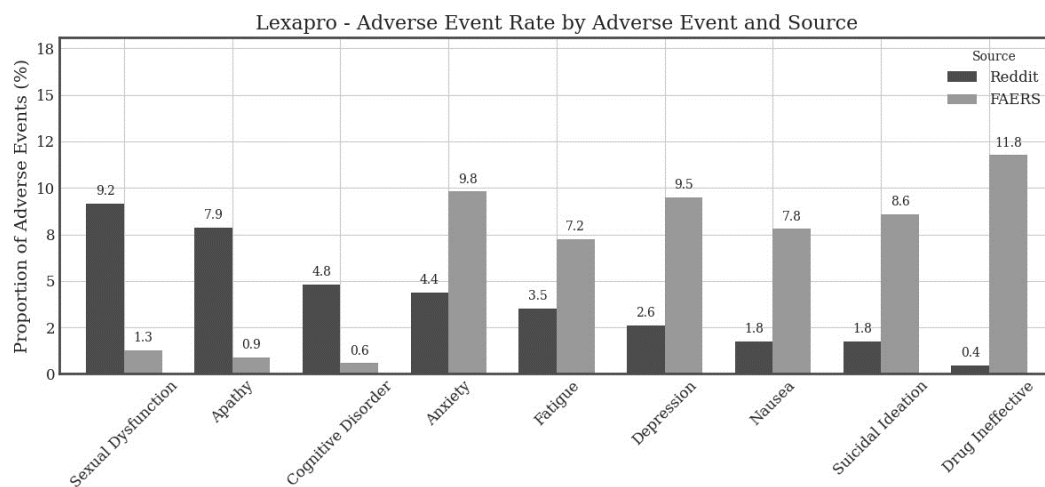

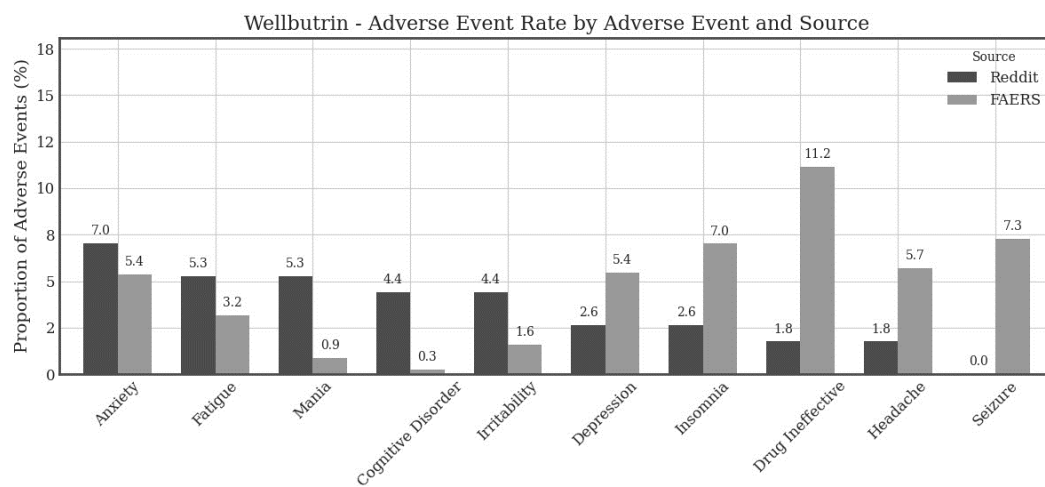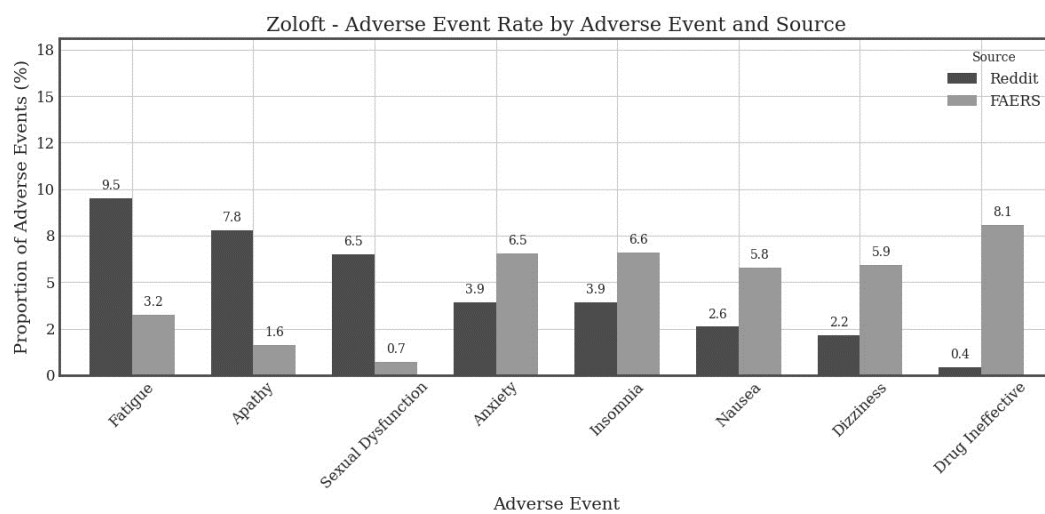

Source: https://medrxiv.org/content/10.1101/2024.08.13.24311929v1.full.pdf
